# Supplementary material for: A host–guest inclusion compound for reversible switching of quadratic nonlinear optical properties
Source: Royal Society of Chemistry journal article supplement (doi:10.1039/c4cc08711a), 2014-12-19
Supplement: c4cc08711a1.pdf [file c4cc08711a1.pdf]

## Electronic Supplementary Information

### A host-guest inclusion compound for reversible switching of quadratic nonlinear optical properties

Chengmin Ji, Zhihua Sun, Shuquan Zhang, Sangen Zhao, Tianliang Chen, Yuanyuan Tang,  
Junhua Luo\*

<sup>a</sup> Key Laboratory of Optoelectronic Materials Chemistry and Physics, Fujian Institute of Research on the Structure of Matter, Chinese Academy of Sciences, Fuzhou, Fujian, 350002, P.R. China. E-mail: jhluo@fjirsm.ac.cn. Fax: (+86) 0591483730955. Tel: (+86) 0591483730955.

<sup>b</sup> State Key Laboratory of Structural Chemistry, Fujian Institute of Research on the Structure of Matter, Chinese Academy of Sciences, Fuzhou, Fujian, 350002, P.R. China.

#### Experimental details

All the chemical reagents were purchased as high purity (AR grade) and used without any further purification. [(Dipropylammonium)(18-crown-6)]ClO<sub>4</sub> has been synthesized in aqueous solution of perchloric acid, dipropylamine and 18-crown-6 in a ratio of 1:1:1. XRPD patterns were recorded by an X-ray diffractometer (Rigaku Corporation SCXmini). Thermal properties including DSC and specific heat were respectively measured by a differential thermal analyzer of Netzsch DSC 200 F3 under nitrogen atmosphere in aluminum crucibles with the heating/cooling rate of 10 K/min. Dielectric experiments were carried out on polycrystalline powder specimen by TH2828 Precision LCR Meter at different frequency with an applied electric field of 0.5 V. The electrodes were made by sputtering silver onto both sides of samples and attaching copper leads with silver paste. Calibration of standard capacitor reveals that the experimental errors are within  $\pm 1\%$  accuracy. Variable-temperature SHG experiments were executed by Kurtz-Perry powder SHG test using an Nd:YAG laser (1064 nm) with input pulse of 350 mV under a programmable cryogenic cooling system.[1] The values of the nonlinear optical coefficients for SHG have been determined by comparison with a KDP reference.[2]

Variable-temperature X-ray single crystal diffraction experiments were performed on a Rigaku Saturn70 diffractometer with Mo/Cu-K $\alpha$  radiation ( $\lambda = 0.71073/1.5406 \text{ \AA}$ ). Absorption corrections were applied by using multi-scan program.[3] Crystal structures were solved by direct methods and refined by the full-matrix method based on  $F^2$  using the SHELXLTL software package using SHELXS-97.[4] All non-hydrogen atoms positions were located using difference Fourier methods as implemented in SHELXL-97. All of the non-hydrogen atoms were refined anisotropically and the positions of the hydrogen atoms were generated geometrically.

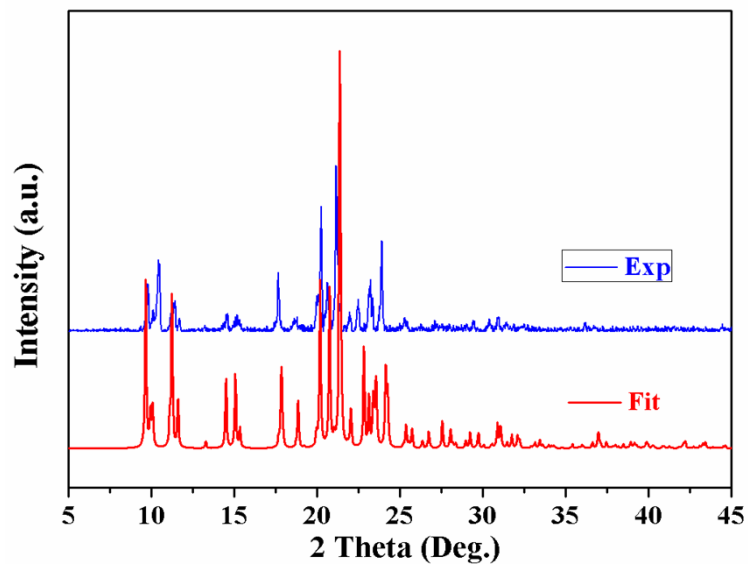

Figure S1. Simulated and experimental XRD powder patterns for [(DPA)(18-crown-6)]ClO<sub>4</sub>

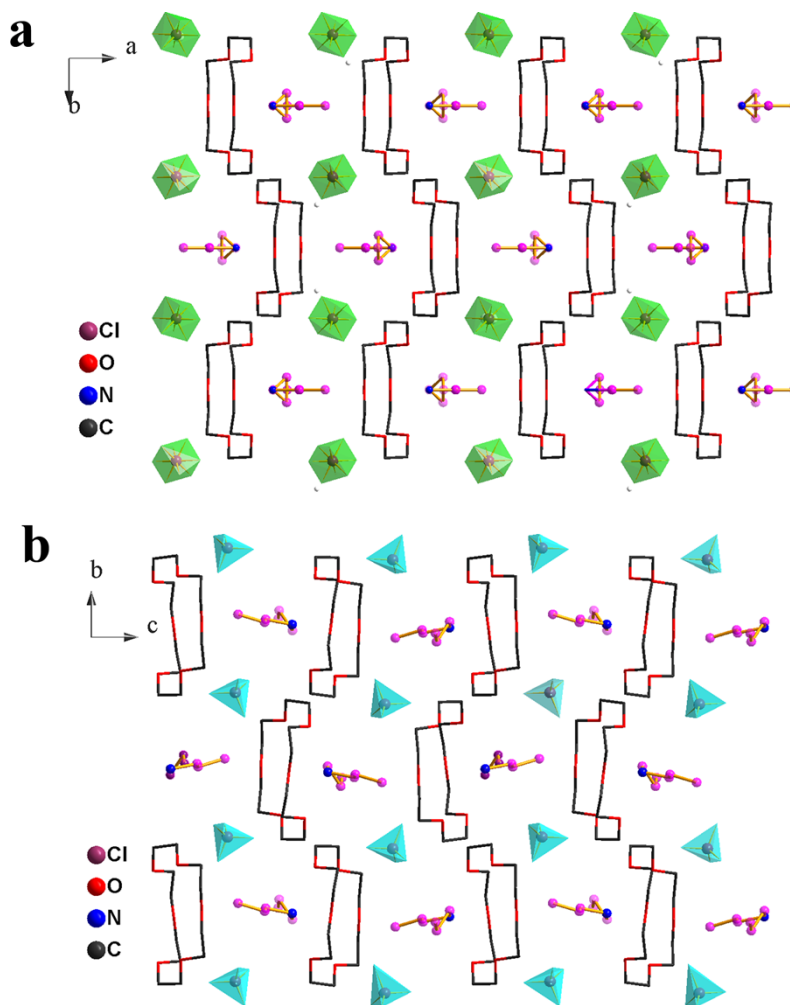

Figure S2. Packing views along the (a) *a*-axis (RTP) and (b) *c*-axis (LTP) for [(DPA)(18-crown-6)]ClO<sub>4</sub>

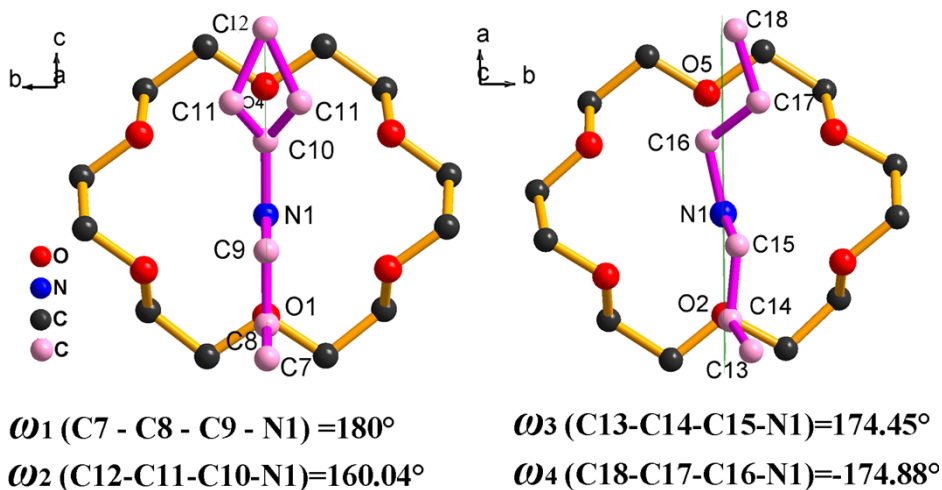

Figure S3. The torsion angles for C-C-C-N of DPA cations at 100K and 293 K.

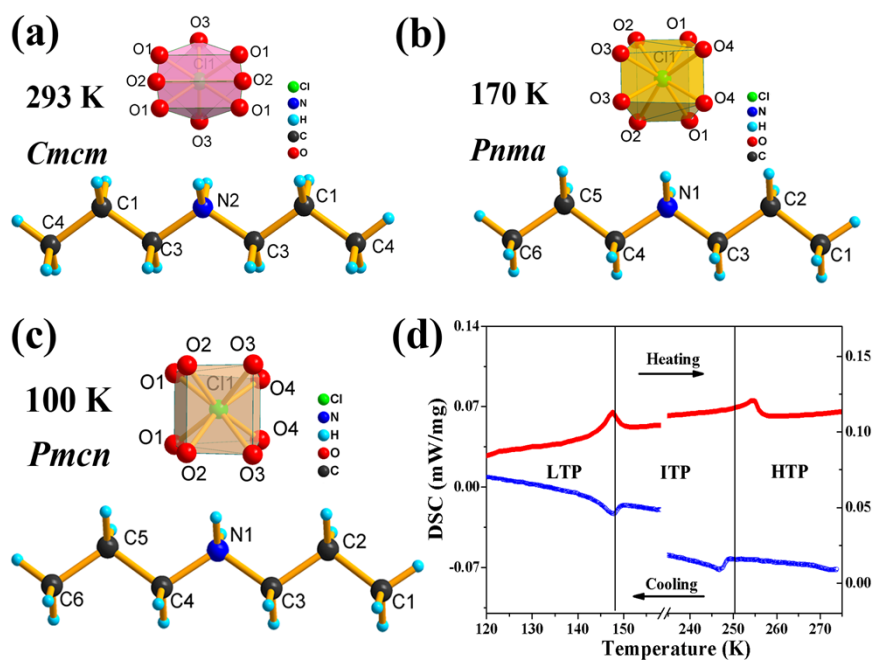

Figure S4. Asymmetric unit of (DPA)ClO<sub>4</sub> in (a) RTP, (b) ITP and (c) LTP. Hydrogen atoms are omitted for clarity. (d) DSC curves of 1 obtained on a heating-cooling cycle.

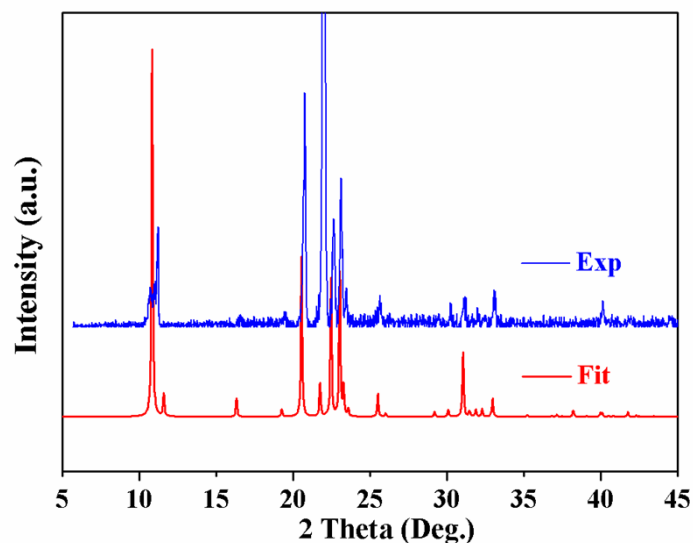

Figure S5. Simulated and experimental XRD powder patterns for (DPA)ClO<sub>4</sub>

Table S1. Crystal data and structure refinement details for [(DPA)(18-crown-6)]ClO<sub>4</sub> at 100K and 293 K.

| Empirical formula                        | C <sub>18</sub> H <sub>40</sub> Cl N O <sub>10</sub> |                                                    |
|------------------------------------------|------------------------------------------------------|----------------------------------------------------|
| Formula weight                           | 465.96                                               | 465.96                                             |
| Temperature                              | 100 K                                                | 293 K                                              |
| Wavelength                               | 0.71073                                              | 1.54184                                            |
| Crystal system,                          | Orthorhombic,                                        | Orthorhombic,                                      |
| space group                              | <i>P2<sub>1</sub>2<sub>1</sub>2<sub>1</sub></i>      | <i>Pnma</i>                                        |
| a (Å)                                    | 10.031                                               | 16.577                                             |
| c (Å)                                    | 15.109                                               | 15.142                                             |
| c (Å)                                    | 16.199                                               | 10.091                                             |
| V (Å <sup>3</sup> )                      | 2455                                                 | 2532.78(9)                                         |
| Z                                        | 4                                                    | 4                                                  |
| Calculated density (mg/Å <sup>3</sup> )  | 1.261                                                | 1.222                                              |
| F(000)                                   | 1008                                                 | 1008                                               |
| Limiting indices                         | -13 ≤ h ≤ 13, -19 ≤ k ≤ 19, -21 ≤ l ≤ 19             | -20 ≤ h ≤ 18, -18 ≤ k ≤ 18, -12 ≤ l ≤ 12           |
| Reflections collected / unique           | 18956/5591 [R(int) = 0.0546]                         | 8168/2620 [R(int) = 0.0162]                        |
| Completeness                             | 99.6 %                                               | 97.3 %                                             |
| Max. and min. transmission               | 0.9603 and 0.9603                                    | 0.7207 and 0.7207                                  |
| Refinement method                        | Full-matrix least-squares on <i>F</i> <sup>2</sup>   | Full-matrix least-squares on <i>F</i> <sup>2</sup> |
| Data / restraints / parameters           | 5591 / 0 / 273                                       | 2062 / 0 / 182                                     |
| Goodness-of-fit on <i>F</i> <sup>2</sup> | 1.077                                                | 1.044                                              |
| Final R indices [I > 2σ(I)]              | R <sub>1</sub> = 0.0376, wR <sub>2</sub> = 0.0903    | R <sub>1</sub> = 0.0471, wR <sub>2</sub> = 0.1369  |
| R indices (all data)                     | R <sub>1</sub> = 0.0482, wR <sub>2</sub> = 0.1329    | R <sub>1</sub> = 0.0580, wR <sub>2</sub> = 0.1481  |

Table S2. Crystal data and structure refinement details for (DPA)ClO<sub>4</sub> at 100 K, 170K and 273K

|                                          |                                                       |                                                        |                                                        |
|------------------------------------------|-------------------------------------------------------|--------------------------------------------------------|--------------------------------------------------------|
| Empirical formula                        | C <sub>6</sub> H <sub>16</sub> Cl N O <sub>4</sub>    |                                                        |                                                        |
| Formula weight                           | 201.65                                                | 201.65                                                 | 201.65                                                 |
| Temperature                              | 100 K                                                 | 170 K                                                  | 273 K                                                  |
| Crystal system,                          | Orthorhombic,                                         | Orthorhombic,                                          | Orthorhombic,                                          |
| space group                              | <i>Pmcn</i>                                           | <i>Pnma</i>                                            | <i>Cmcm</i>                                            |
| a (Å)                                    | 7.4714(8)                                             | 8.5346(3)                                              | 16.354                                                 |
| b (Å)                                    | 16.0278(18)                                           | 7.5928(3)                                              | 8.649                                                  |
| c (Å)                                    | 8.4874(9)                                             | 16.1352(6)                                             | 7.727                                                  |
| V(Å <sup>3</sup> )                       | 1016.37(19)                                           | 1045.59(7)                                             | 1092.83                                                |
| Z                                        | 4                                                     | 4                                                      | 4                                                      |
| Calculated density (mg/Å <sup>3</sup> )  | 1.319                                                 | 1.281                                                  | 1.226                                                  |
| F(000)                                   | 432                                                   | 432                                                    | 432                                                    |
| Limiting indices                         | -8≤h≤8,<br>-18≤k≤18,<br>-10≤l≤9                       | -10≤h≤10,<br>-8≤k≤8,<br>-18≤l≤19                       | -19≤h≤20,<br>-7≤k≤10,<br>-6≤l≤9                        |
| Reflections collected/unique             | 5387 / 966 [R(int)=<br>0.0680]                        | 5515 / 991 [R(int) =<br>0.0326]                        | 1695 / 601 [R(int)=<br>0.0155]                         |
| Completeness                             | 99.4 %                                                | 99.4 %                                                 | 96.0 %                                                 |
| Refinement method                        | Full-matrix least-squares<br>on <i>F</i> <sup>2</sup> | Full-matrix least-<br>squares on <i>F</i> <sup>2</sup> | Full-matrix least-<br>squares on <i>F</i> <sup>2</sup> |
| Data / restraints/parameters             | 966 / 1 / 98                                          | 991 / 1 / 103                                          | 601 / 19 / 53                                          |
| Goodness-of-fit on <i>F</i> <sup>2</sup> | 1.265                                                 | 1.078                                                  | 1.116                                                  |
| Final R indices [I>2σ(I)]                | R <sub>1</sub> = 0.1108,<br>wR <sub>2</sub> = 0.3618  | R <sub>1</sub> = 0.0346,<br>wR <sub>2</sub> = 0.0830   | R <sub>1</sub> = 0.0723,<br>wR <sub>2</sub> = 0.2089   |
| R indices (all data)                     | R <sub>1</sub> = 0.1154,<br>wR <sub>2</sub> = 0.3640  | R <sub>1</sub> = 0.0454,<br>wR <sub>2</sub> = 0.0894   | R <sub>1</sub> = 0.0762,<br>wR <sub>2</sub> = 0.2176   |

Table S3 Atomic coordinates ( $\times 10^4$ ) and equivalent isotropic displacement parameters ( $\text{\AA}^2 \times 10^{-3}$ ) for [(DPA)(18-crown-6)]ClO<sub>4</sub> at 293 K. U(eq) is defined as one third of the trace of the orthogonalized U<sub>ij</sub> tensor.

| ATOM  | X       | Y      | Z       | U <sub>(eq)</sub> |
|-------|---------|--------|---------|-------------------|
| Cl(1) | 5000    | 0      | 5000    | 74(1)             |
| O(4)  | 1012(1) | 2500   | 6457(2) | 67(1)             |
| O(2)  | 2407(1) | 905(1) | 3050(1) | 62(1)             |
| O(3)  | 1689(1) | 855(1) | 5611(2) | 68(1)             |

|       |         |         |          |        |
|-------|---------|---------|----------|--------|
| N(1)  | 3094(1) | 2500    | 4210(2)  | 56(1)  |
| C(1)  | 1846(2) | 1725(2) | 1279(2)  | 75(1)  |
| C(6)  | 1032(2) | 1726(2) | 7241(2)  | 80(1)  |
| C(3)  | 2385(2) | 136(1)  | 3868(3)  | 80(1)  |
| C(5)  | 978(1)  | 936(2)  | 6382(2)  | 81(1)  |
| C(2)  | 1741(1) | 960(2)  | 2173(2)  | 76(1)  |
| C(9)  | 3930(2) | 2500    | 3615(3)  | 79(1)  |
| C(4)  | 1679(2) | 101(1)  | 4785(3)  | 82(1)  |
| C(10) | 3098(2) | 2500    | 5671(3)  | 109(2) |
| C(8)  | 3947(2) | 2500    | 2167(3)  | 92(1)  |
| C(7)  | 4766(3) | 2500    | 1618(5)  | 154(3) |
| C(11) | 3533(3) | 2057(3) | 6481(4)  | 70(1)  |
| C(12) | 3552(3) | 2500    | 7922(4)  | 123(2) |
| O(1)  | 1843(1) | 2500    | 2053(2)  | 58(1)  |
| O(8)  | 5778(2) | 29(3)   | 5416(4)  | 94(1)  |
| O(6)  | 4644(3) | -802(3) | -4943(4) | 104(1) |
| O(7)  | 4515(2) | 532(3)  | 6049(6)  | 129(2) |
| O(5)  | 4896(3) | 504(4)  | 3800(6)  | 147(2) |

Table S4. Atomic coordinates ( $\times 10^4$ ) and equivalent isotropic displacement parameters ( $\text{\AA}^2 \times 10^{-3}$ ) for [(DPA)(18-crown-6)]ClO<sub>4</sub> at 100 K. U(eq) is defined as one third of the trace of the orthogonalized U<sub>ij</sub> tensor.

| ATOM  | X        | Y       | Z        | U <sub>(eq)</sub> |
|-------|----------|---------|----------|-------------------|
| Cl(1) | 9874(1)  | 7703(1) | 2374(1)  | 23(1)             |
| O(1)  | 16858(2) | 3344(1) | 168(1)   | 22(1)             |
| O(2)  | 17982(2) | 4934(1) | 672(1)   | 22(1)             |
| O(3)  | 17078(2) | 6530(1) | 19(1)    | 21(1)             |
| O(5)  | 13582(2) | 5146(1) | 1561(1)  | 27(1)             |
| O(6)  | 14317(2) | 3447(1) | 893(1)   | 28(1)             |
| O(4)  | 14512(2) | 6736(1) | 790(1)   | 26(1)             |
| N(1)  | 15764(2) | 4943(1) | 569(1)   | 20(1)             |
| C(11) | 18675(2) | 4120(2) | 756(2)   | 25(1)             |
| C(2)  | 15011(3) | 2628(2) | 900(2)   | 26(1)             |
| C(1)  | 15959(3) | 2608(2) | 186(2)   | 26(1)             |
| C(10) | 18853(2) | 5667(2) | 582(2)   | 24(1)             |
| C(4)  | 12749(3) | 4386(2) | 1562(2)  | 33(1)             |
| O(9)  | 9529(2)  | 7663(1) | 3229(1)  | 33(1)             |
| O(7)  | 10050(2) | 6823(1) | 2064(1)  | 39(1)             |
| C(8)  | 16329(3) | 7333(2) | 25(2)    | 26(1)             |
| C(9)  | 18043(2) | 6498(2) | 667(2)   | 22(1)             |
| C(7)  | 15440(2) | 7440(2) | 767(2)   | 26(1)             |
| C(12) | 17681(2) | 3401(2) | 884(2)   | 26(1)             |
| C(15) | 16307(2) | 4763(2) | -1409(2) | 25(1)             |
| C(14) | 17806(3) | 4866(2) | -1441(2) | 28(1)             |

|       |          |         |          |       |
|-------|----------|---------|----------|-------|
| C(16) | 14291(2) | 5150(2) | -559(2)  | 24(1) |
| C(5)  | 12824(3) | 5942(2) | 1524(2)  | 31(1) |
| C(3)  | 13568(3) | 3566(2) | 1634(2)  | 32(1) |
| O(10) | 8822(2)  | 8131(1) | 1925(1)  | 39(1) |
| C(17) | 13446(2) | 4459(2) | -978(2)  | 28(1) |
| C(6)  | 13753(3) | 6724(2) | 1535(2)  | 30(1) |
| C(13) | 18332(3) | 4589(2) | -2286(2) | 43(1) |
| O(8)  | 11096(2) | 8190(2) | 2280(2)  | 50(1) |
| C(18) | 11993(3) | 4755(2) | -1011(2) | 40(1) |

Table S5. Atomic coordinates ( $\times 10^4$ ) and equivalent isotropic displacement parameters ( $\text{\AA}^2 \times 10^{-3}$ ) for (DPA)ClO<sub>4</sub> at 273 K. U(eq) is defined as one third of the trace of the orthogonalized U<sub>ij</sub> tensor.

| ATOMS | X        | Y        | Z        | U <sub>(eq)</sub> |
|-------|----------|----------|----------|-------------------|
| Cl(1) | 0        | 7184(1)  | 2500     | 65(1)             |
| N(2)  | 0        | 2889(4)  | 2500     | 54(1)             |
| C(3)  | -759(3)  | 1961(5)  | 2500     | 74(1)             |
| C(1)  | -1507(4) | 2915(7)  | 2500     | 97(2)             |
| O(2)  | 0        | 6160(20) | 1080(20) | 70(13)            |
| O(3)  | -617(7)  | 8152(8)  | 2500     | 249(5)            |
| C(4)  | -2272(6) | 1904(17) | 2500     | 159(5)            |
| O(1)  | -410(20) | 6258(19) | 1190(20) | 107(6)            |

Table S6. Atomic coordinates ( $\times 10^4$ ) and equivalent isotropic displacement parameters ( $\text{\AA}^2 \times 10^{-3}$ ) for (DPA)ClO<sub>4</sub> at 170 K. U(eq) is defined as one third of the trace of the orthogonalized U<sub>ij</sub> tensor.

| ATOMS | X       | Y       | Z       | U <sub>(eq)</sub> |
|-------|---------|---------|---------|-------------------|
| Cl(1) | 2837(1) | 2500    | 4892(1) | 30(1)             |
| N(1)  | 2863(2) | 7500    | 4912(1) | 24(1)             |
| O(1)  | 2888(3) | 3799(3) | 4581(2) | 51(1)             |
| C(6)  | 1449(5) | 7500    | 7160(2) | 69(1)             |
| C(2)  | 3190(3) | 7500    | 3381(1) | 38(1)             |
| C(4)  | 1770(3) | 7500    | 5631(1) | 30(1)             |
| O(2)  | 3744(3) | 3809(3) | 5342(2) | 52(1)             |
| C(5)  | 2611(3) | 7500    | 6450(2) | 41(1)             |
| C(3)  | 2051(3) | 7500    | 4095(1) | 31(1)             |
| O(3)  | 1712(3) | 3272(3) | 5425(2) | 56(1)             |
| C(1)  | 2324(5) | 7500    | 2561(2) | 63(1)             |
| O(4)  | 2050(3) | 1638(4) | 4225(2) | 60(1)             |

Table S7. Atomic coordinates ( $\times 10^4$ ) and equivalent isotropic displacement parameters ( $\text{\AA}^2 \times 10^{-3}$ ) for (DPA)ClO<sub>4</sub> at 100 K. U(eq) is defined as one third of the trace of the orthogonalized U<sub>ij</sub> tensor.

| ATOMS | X | Y | Z | U <sub>(eq)</sub> |
|-------|---|---|---|-------------------|
|-------|---|---|---|-------------------|

---

|       |          |         |          |       |
|-------|----------|---------|----------|-------|
| Cl(1) | 7500     | 5114(2) | 7096(3)  | 20(1) |
| N(1)  | 2500     | 5104(5) | 7200(1)  | 18(2) |
| C(4)  | 2500     | 4373(7) | 8316(14) | 21(3) |
| C(2)  | 2500     | 6652(7) | 6841(14) | 24(3) |
| O(2)  | 6243(17) | 5486(8) | 6019(13) | 29(4) |
| C(4)  | 6195(17) | 4599(8) | 6212(14) | 33(4) |
| O(2)  | 6476(18) | 5750(8) | 7898(14) | 30(4) |
| C(5)  | 2500     | 2832(9) | 8266(19) | 37(4) |
| C(3)  | 2500     | 3553(7) | 7444(15) | 27(3) |
| O(3)  | 2500     | 5929(7) | 8017(14) | 25(3) |
| C(1)  | 6625(19) | 4601(8) | 8204(14) | 32(4) |
| O(4)  | 2500     | 7473(8) | 7714(18) | 33(3) |

---

### References

- [1] S. K. Kurtz and T. T. Perry, *J. Appl. Phys*, 1968, 39, 3798.
- [2] D. A. Robert, *IEEE J*, 1992, QE-28, 2057.
- [3] *APEX2, SADABS and SAINT*. Bruker AXS Inc.: Madison, Wisconsin, USA.. 2008.
- [4] G. M. Sheldrick, *SHELXL 97, Program for Crystal Structure Solution*; University of Göttingen: Göttingen, Germany, 1997.
